# Supplementary material for: Highly dispersed Ni–Fe active sites on a fullerene based electron buffer to boost the oxygen evolution reaction
Source: Royal Society of Chemistry journal article supplement (doi:10.1039/d4ta06990k), 2025-01-01
Supplement: d4ta06990k1.pdf [file d4ta06990k1.pdf]

## Supplementary Information

### Highly Dispersed Ni-Fe Active Sites on Fullerene based Electron Buffer to boost Oxygen Evolution Reaction

Qin Tang,<sup>a</sup> Lingyue Wang,<sup>a</sup> Shenglong Zhang,<sup>a</sup> Pengfei Xue,<sup>b</sup> Yuye  
Zhang,<sup>a</sup> Hongbo Li,<sup>a\*</sup> Dongdong Zhu<sup>b\*</sup>

<sup>a</sup> School of Chemistry and Chemical Engineering, Yancheng Institute of  
Technology, Yancheng, 224051, China. Email: hbli@ycit.edu.cn

<sup>b</sup> School of Chemistry and Materials Science, Institute of Advanced  
Materials and Flexible Electronics (IAMFE), Nanjing University of  
Information Science and Technology, 219 Ningliu Road, Nanjing, 210044,  
China. E-mail: dd.zhu@nuist.edu.cn

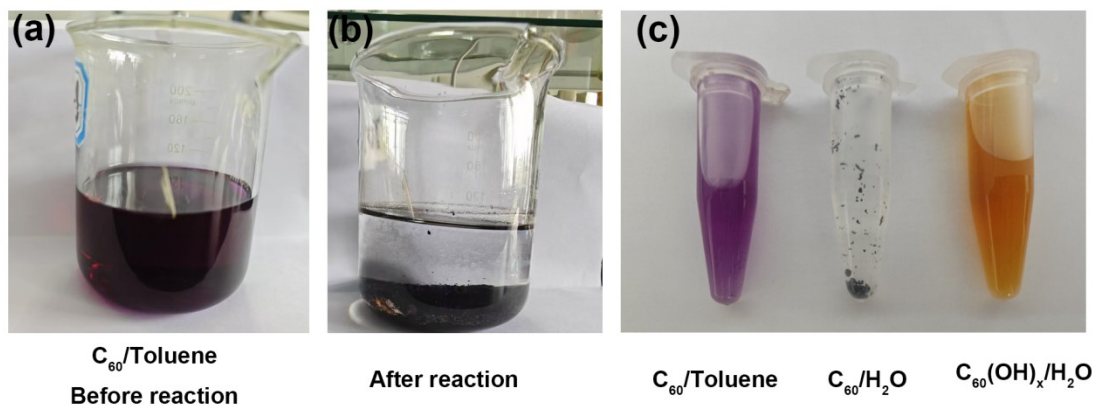

**Fig. S1** Digital photos of C<sub>60</sub> in toluene (a) before reaction, (b) after reaction, (c) contrast of C<sub>60</sub> in toluene, C<sub>60</sub> in H<sub>2</sub>O and C<sub>60</sub>(OH)<sub>x</sub> in H<sub>2</sub>O.

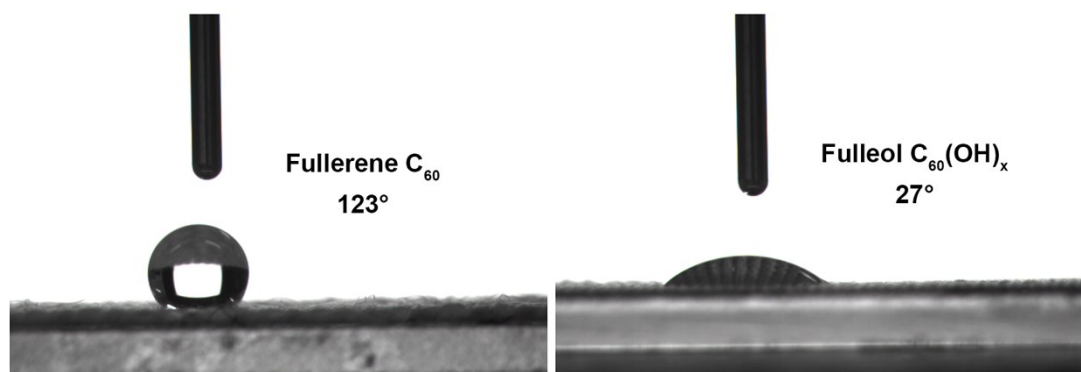

**Fig. S2** Contact angles of fullerene C<sub>60</sub> and fulleol C<sub>60</sub>(OH)<sub>x</sub>.

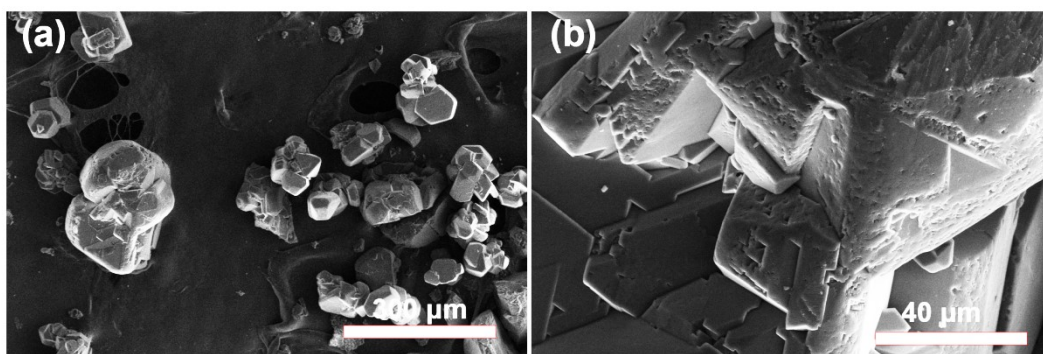

Fig. S3 (a-b) SEM images of C<sub>60</sub> powders.

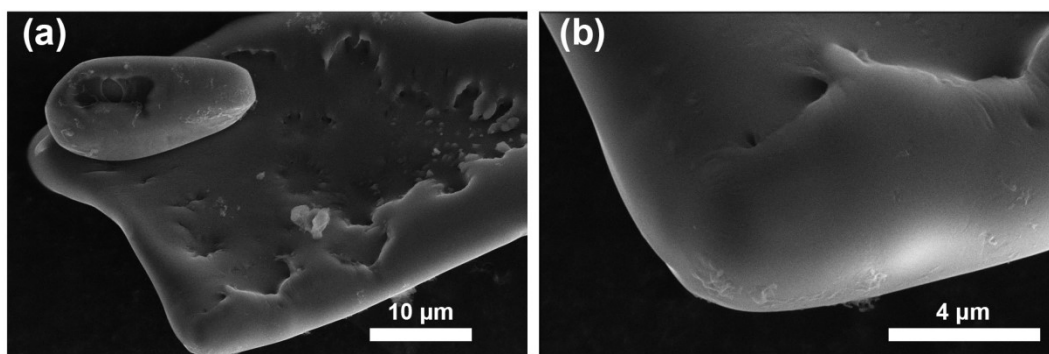

Fig. S4 (a-b) SEM images of C<sub>60</sub>(OH)<sub>x</sub> powders.

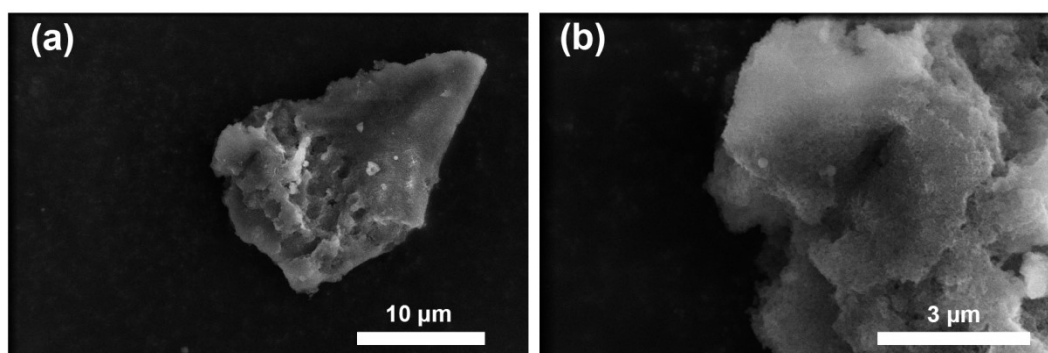

Fig. S5 (a-b) SEM images of NiFe-OC<sub>60</sub> powders.

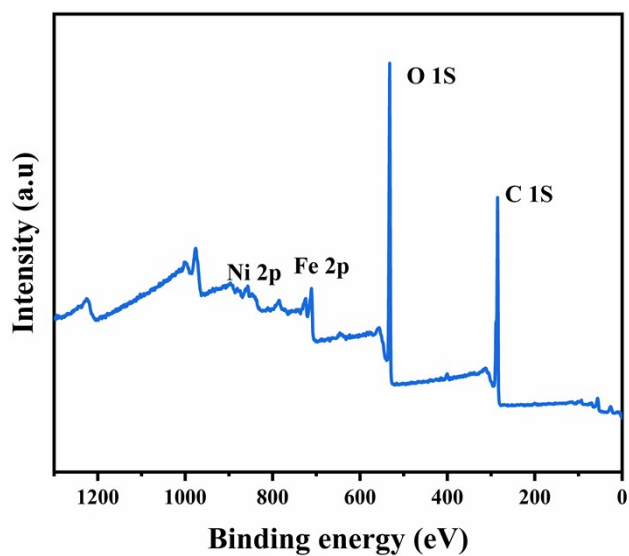

Fig. S6 XPS survey spectrum of NiFe-OC<sub>60</sub>.

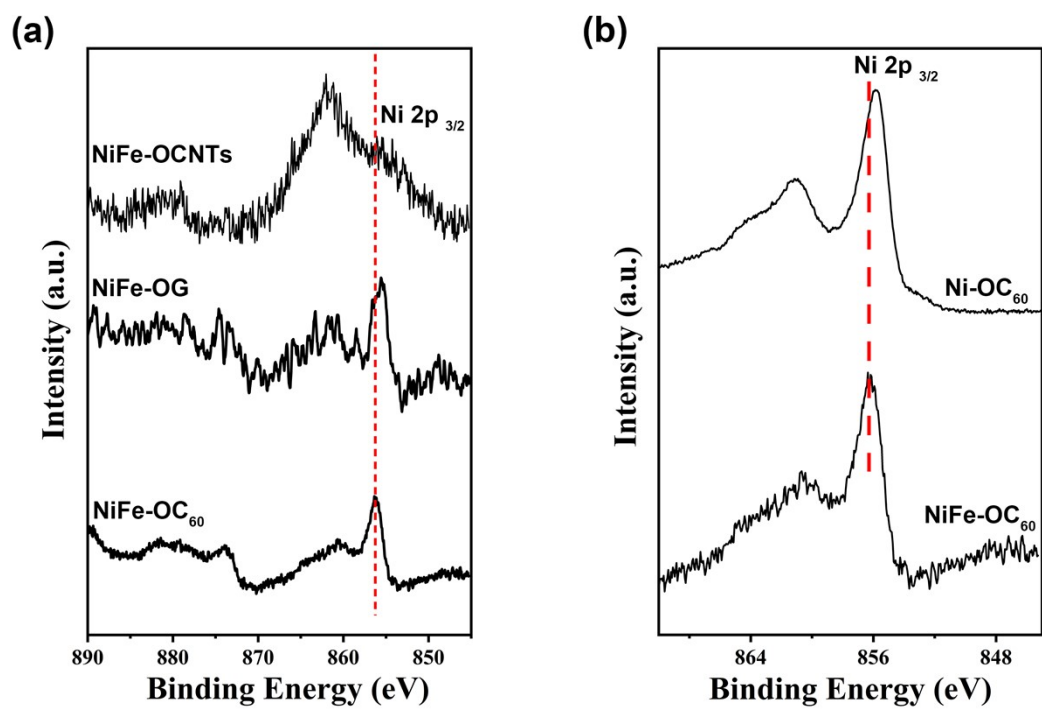

Fig. S7 (a) XPS Ni 2p spectra of NiFe-OCNTs, NiFe-OG and NiFe-OC<sub>60</sub>, (b) XPS Ni 2p spectra of Ni-OC<sub>60</sub> and NiFe-OC<sub>60</sub>.

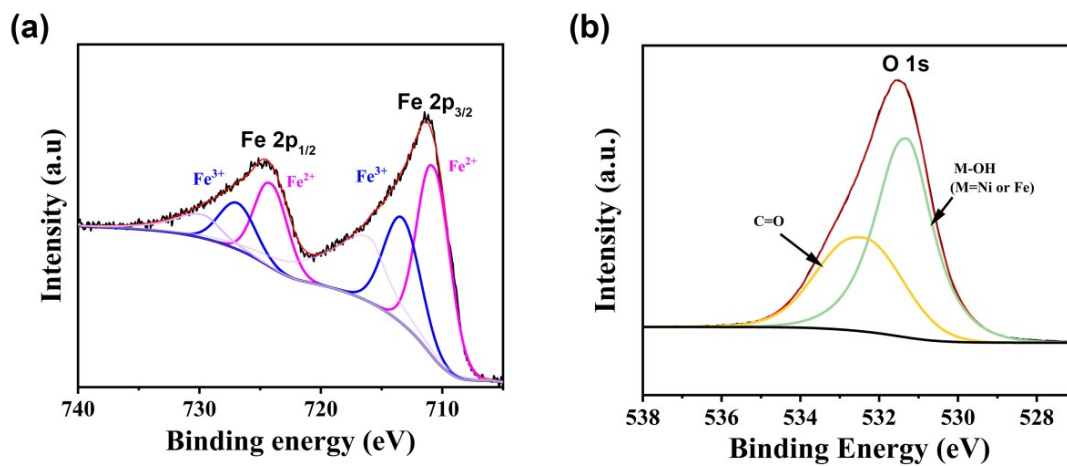

Fig. S8 (a) XPS Fe 2p spectrum of NiFe-OC<sub>60</sub>, and (b) XPS O 1s spectrum of NiFe-OC<sub>60</sub>.

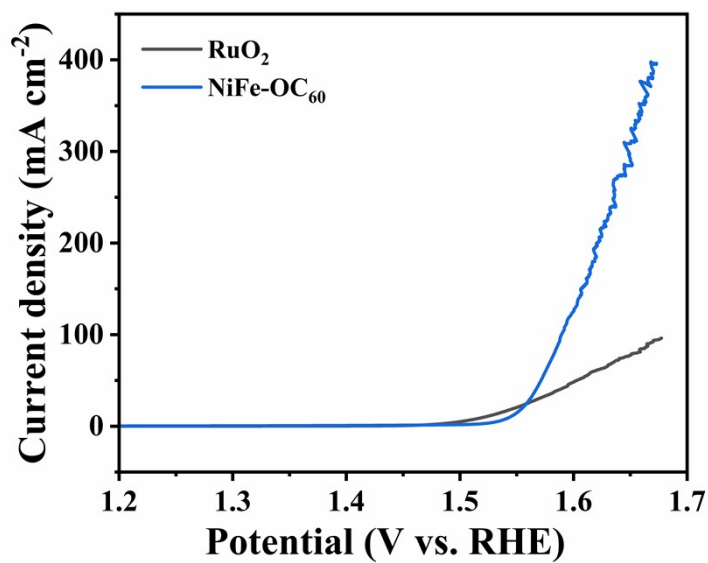

Fig. S9 LSV curves of NiFe-OC<sub>60</sub> and commercial RuO<sub>2</sub>.

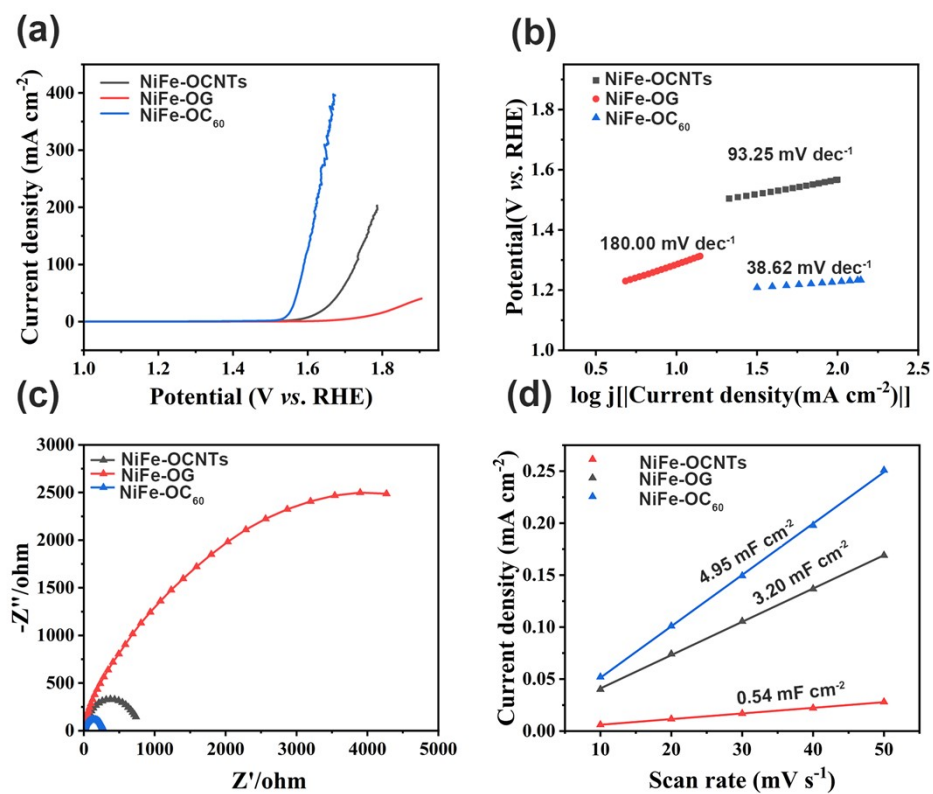

**Fig. S10** Comparison of NiFe-OCNTs, NiFe-OG and NiFe-OC<sub>60</sub> (a) LSV, (b) Tafel plots, (c) Nyquist plots, (d) Current density as a function of the scan rate to give the double-layer capacitance ( $C_{dl}$ ).

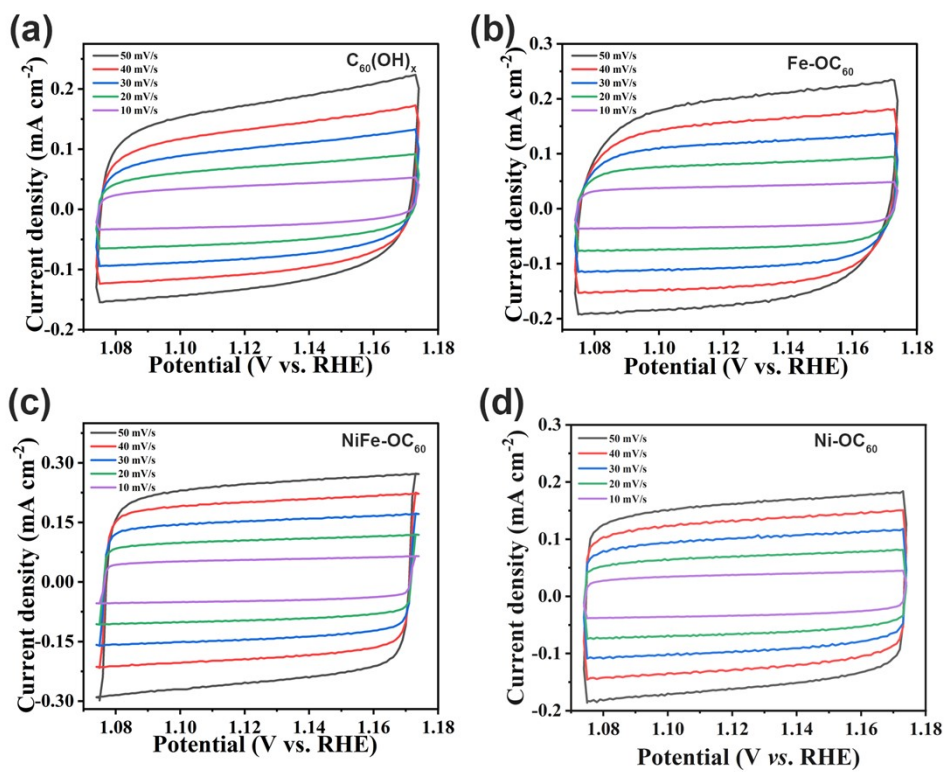

**Fig. S11** CV curves of (a)  $C_{60}(OH)_x$ , (b)  $Fe-OC_{60}$ , (c)  $NiFe-OC_{60}$ , (d)  $Ni-OC_{60}$ .

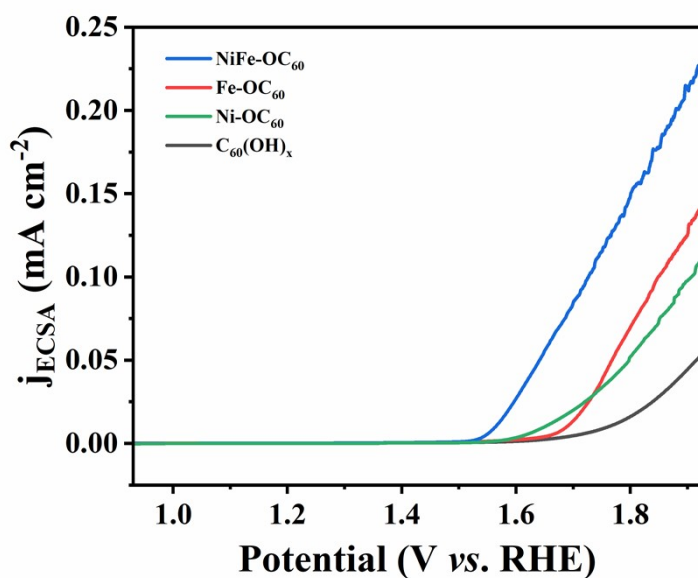

**Fig. S12** ECSA-normalized LSV curves of NiFe-OC<sub>60</sub>, Fe-OC<sub>60</sub>, Ni-OC<sub>60</sub> and C<sub>60</sub>(OH)<sub>x</sub>.

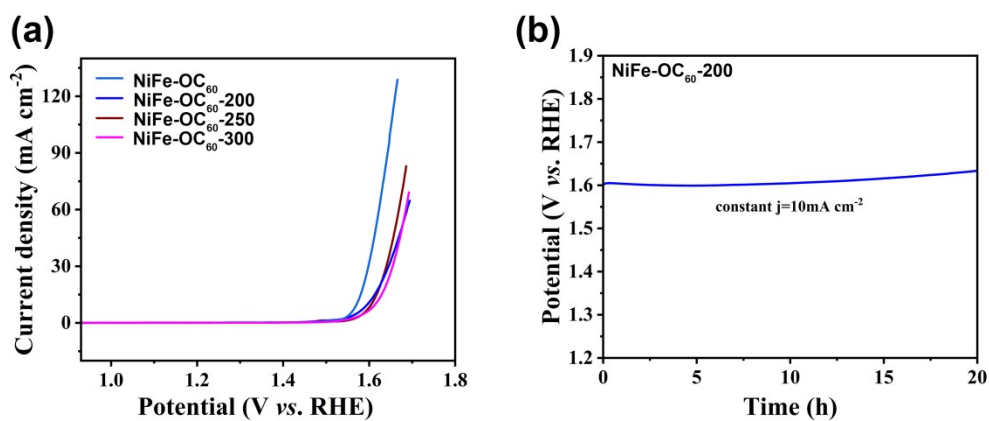

**Fig. S13** (a) LSV curves of NiFe-OC<sub>60</sub>, NiFe-OC<sub>60</sub>-200, NiFe-OC<sub>60</sub>-250 and NiFe-OC<sub>60</sub>-300 samples, (b) Chronopotentiometry curve of NiFe-OC<sub>60</sub>-200 measured at a fixed current density of 10 mA cm<sup>-2</sup>.



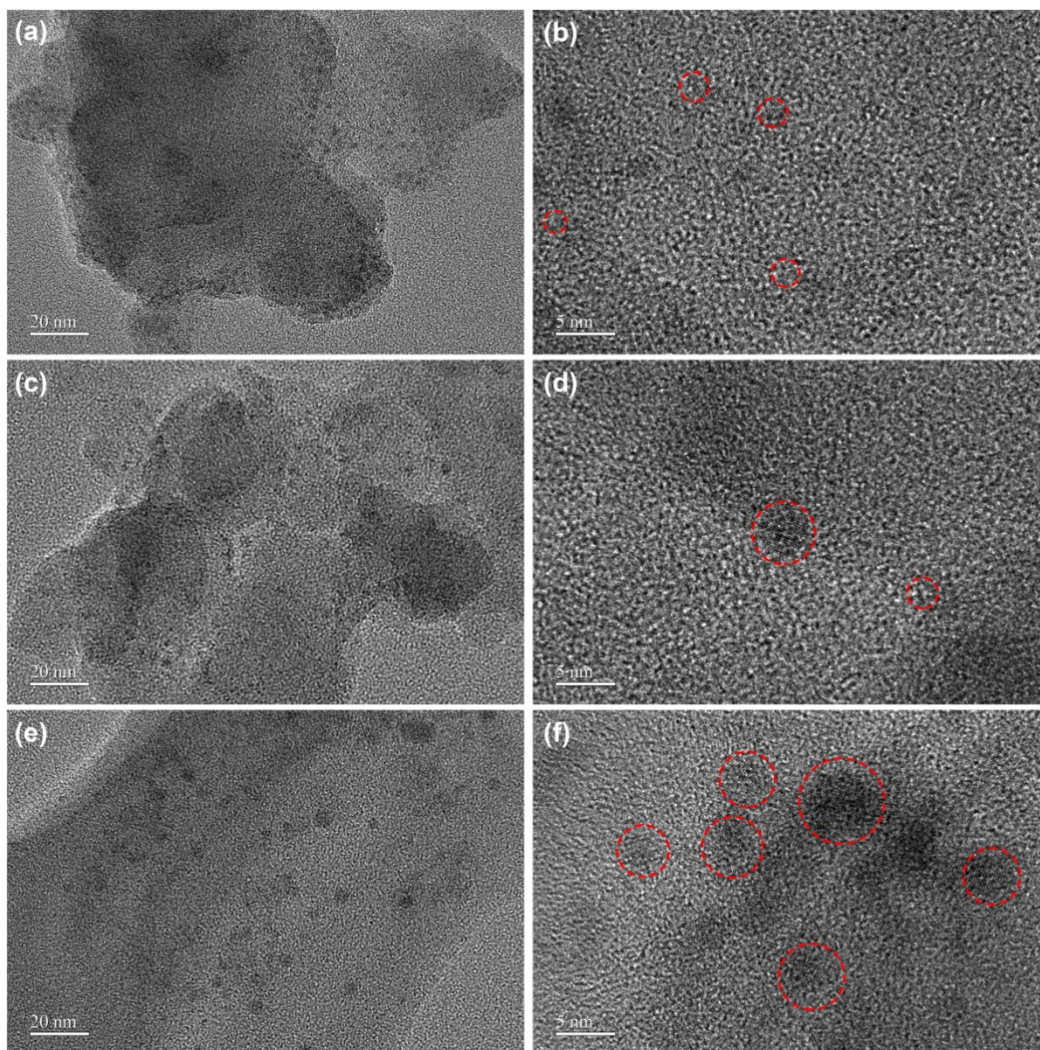

**Fig. S14** TEM and HRTEM images of (a, b) NiFe-OC<sub>60</sub>-200, (c, d) NiFe-OC<sub>60</sub>-250, and (e, f) NiFe-OC<sub>60</sub>-300 samples before OER test.

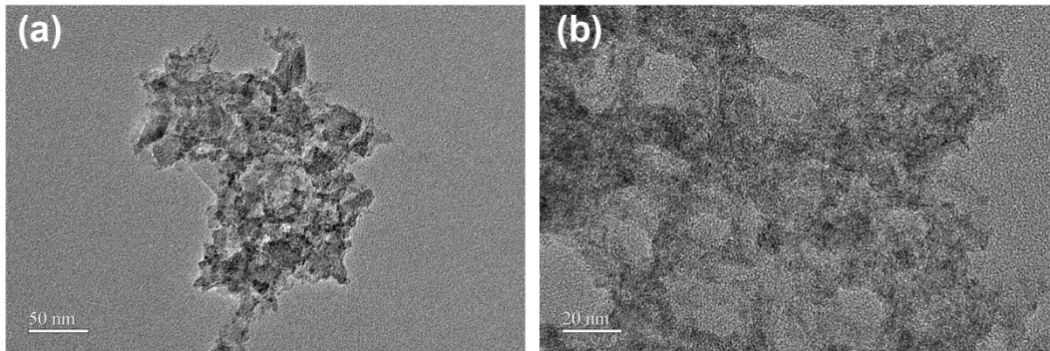

**Fig. S15** (a-b) TEM images of NiFe-OC<sub>60</sub> after OER stability test.

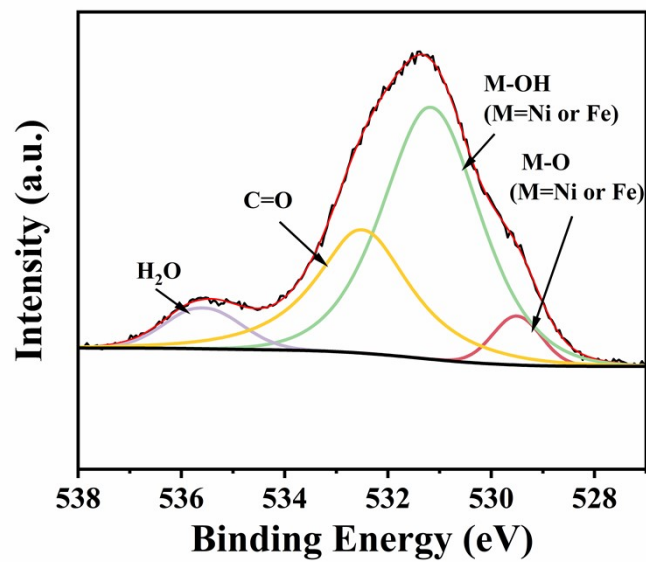

**Fig. S16** High-resolution O 1s spectrum of NiFe-OC<sub>60</sub> after OER stability test.

**Table S1.** Overpotentials and Tafel plots of NiFe-OC<sub>60</sub> samples prepared with different Ni/Ni+Fe molar ratios in 1.0 M KOH.

| Ni/Ni+Fe<br>molar ratio | Overpotential (mV)<br>@ 10 mA cm <sup>-2</sup> | Current density (mA cm <sup>-2</sup> )<br>@ 1.6 V vs. RHE | Tafel Slope<br>(mV dec <sup>-1</sup> ) |
|-------------------------|------------------------------------------------|-----------------------------------------------------------|----------------------------------------|
| 0.1                     | 334                                            | 30.29                                                     | 141.15                                 |
| 0.3                     | 393                                            | 5.14                                                      | 202.61                                 |
| 0.5                     | 383                                            | 7.26                                                      | 144.02                                 |
| 0.7                     | 388                                            | 5.63                                                      | 154.41                                 |
| 0.9                     | 314                                            | 126.11                                                    | 38.62                                  |

**Table S2.** Comparison of NiFe-OC<sub>60</sub> with some other OER electrocatalysts based on fullerene, graphene, carbon nanotube or Ni/Fe in alkaline conditions.

| Catalyst                                | Overpotential (mV)<br>at 10 mA cm <sup>-2</sup> | Tafel slope<br>(mV dec <sup>-1</sup> ) | Ref.      |
|-----------------------------------------|-------------------------------------------------|----------------------------------------|-----------|
| NiFe-OC <sub>60</sub>                   | 314                                             | 38.62                                  | This work |
| Ni-OC <sub>60</sub>                     | 407.96                                          | 130.49                                 | This work |
| NiFe-OCNTs                              | 381.1                                           | 93                                     | This work |
| NiFe-OG                                 | 533.5                                           | 180                                    | This work |
| NFO/G                                   | 330                                             | 137.8                                  | 1         |
| Ni-MWCNTs                               | 320                                             | 46.16                                  | 2         |
| p-NFNR@Ni-Co-P                          | 272                                             | 62                                     | 3         |
| FeNi LDH@3DG/CNs                        | 380                                             | 77.9                                   | 4         |
| Ni <sub>0.9</sub> Fe <sub>0.1</sub> /NC | 330                                             | 45                                     | 5         |
| FQD/CoNi-LDH                            | 340                                             | 94                                     | 6         |
| CeNdS/C <sub>60</sub>                   | 346                                             | 68                                     | 7         |
| F/BCN                                   | 390                                             | 79                                     | 8         |
| Ni-NiO@3DHPG                            | 410                                             | 55                                     | 9         |
| Ni-Mo <sub>x</sub> C/NC-100             | 328                                             | 74                                     | 10        |
| NiFe <sub>2</sub> O <sub>4</sub> /SWCNT | 356                                             | 158                                    | 11        |
| Fe <sub>2</sub> N/r-GO-20               | 390                                             | 93                                     | 12        |
| Ni <sub>3</sub> N/r-GO-20               | 352                                             | 65                                     | 12        |
| NiFeO <sub>x</sub>                      | 350                                             | -                                      | 13        |
| NiFeO <sub>x</sub> H <sub>y</sub>       | 348                                             | 41.5                                   | 14        |
| NiFe LDH                                | 310                                             | 78                                     | 15        |

## References

1. J.-Y. Qin, S.-k. Wang, S. Zhou, T. Liu, Y.-h. Yin and J. Yang, *Adv. Energy Sustainability Res.*, 2021, **2**, 2000106.
2. S. Kang, H. Han, S. Mhin, H. R. Chae, W. R. Kim and K. M. Kim, *Appl. Surf. Sci.*, 2021, **547**, 149197.
3. Y. Feng, R. Wang, P. Dong, X. Wang, W. Feng, J. Chen, L. Cao, L. Feng, C. He and J. Huang, *ACS Appl. Mater. Interfaces*, 2021, **13**, 48949-48961.
4. Y. Li, M. Zhao, Y. Zhao, L. Song and Z. Zhang, *Part. Syst. Charact.*, 2016, **33**, 158-166.
5. X. Zhang, H. Xu, X. Li, Y. Li, T. Yang and Y. Liang, *ACS Catal.*, 2016, **6**, 580-588.
6. Y. Feng, X. Wang, J. Huang, P. Dong, J. Ji, J. Li, L. Cao, L. Feng, P. Jin and C. Wang, *Chem. Eng. J.*, 2020, **390**, 124525.
7. T. Munawar, A. Bashir, M. S. Nadeem, F. Mukhtar, S. Manzoor, M. N. Ashiq, S. A. Khan, M. Koc and F. Iqbal, *Energy Fuels*, 2023, **37**, 1370-1386.
8. M. A. Ahsan, T. He, K. Eid, A. M. Abdullah, M. L. Curry, A. Du, A. R. Puente Santiago, L. Echegoyen and J. C. Noveron, *J. Am. Chem. Soc.*, 2021, **143**, 1203-1215.
9. N. Ullah, M. Xie, L. Chen, W. Yaseen, W. Zhao, S. Yang, Y. Xu and J. Xie, *Mater. Chem. Phys.*, 2021, **261**, 124237.
10. D. Das, S. Santra and K. K. Nanda, *ACS Appl. Mater. Interfaces*, 2018, **10**, 35025-35038.
11. P. V. Shinde, R. Samal and C. S. Rout, *Trans. Tianjin Univ.*, 2022, **28**, 80-88.
12. Y. Gu, S. Chen, J. Ren, Y. A. Jia, C. Chen, S. Komarneni, D. Yang and X. Yao, *ACS Nano*, 2018, **12**, 245-253.
13. C. C. McCrory, S. Jung, J. C. Peters and T. F. Jaramillo, *J. Am. Chem. Soc.*, 2013, **135**, 16977-16987.
14. D. Xu, M. B. Stevens, M. R. Cosby, S. Z. Oener, A. M. Smith, L. J. Enman, K. E. Ayers, C. B. Capuano, J. N. Renner and N. Danilovic, *ACS Catal.*, 2018, **9**, 7-15.
15. Q. Zhou, Y. Chen, G. Zhao, Y. Lin, Z. Yu, X. Xu, X. Wang, H. K. Liu, W. Sun and S. X. Dou, *ACS Catal.*, 2018, **8**, 5382-5390.
